# Supplementary material for: A powerful score-based statistical test for group difference in weighted biological networks
Source: PubMed Central journal article supplement (PMC4751708; doi:10.1186/s12859-016-0916-x), 2016-02-12
Supplement: 12859_2016_916_MOESM1_ESM.pdf [file 12859_2016_916_MOESM1_ESM.pdf]

## Additional file 1

**Table S1.** The location and SNP number for 5 susceptibility genes belonging to the network associated with leprosy

| Genes           | Gene ID | SNP number | Location |
|-----------------|---------|------------|----------|
| <i>CARD6</i>    | 84674   | 197        | 5p13.1   |
| <i>HLA-DRB1</i> | 3123    | 246        | 6p21.3   |
| <i>RIPK2</i>    | 8767    | 181        | 8q21     |
| <i>CARD9</i>    | 64170   | 69         | 9q34.3   |
| <i>IFNG</i>     | 3458    | 221        | 12q14    |

**Table S2.** The location and probe sets number for genes belonging to the subnetwork from *PI3K-AKT* signaling pathway and Notch signaling pathway

| Genes                             | Gene ID | Probe sets number | Location       |
|-----------------------------------|---------|-------------------|----------------|
| <i>PI3K-AKT</i> signaling pathway |         |                   |                |
| <i>KRAS</i>                       | 3845    | 5                 | 12P12.1        |
| <i>PIK3CA</i>                     | 5290    | 3                 | 3q26.3         |
| <i>IRS1</i>                       | 3667    | 2                 | 2q36           |
| <i>PDPK1</i>                      | 5170    | 4                 | 16p13.3        |
| <i>AKT1</i>                       | 207     | 1                 | 14q32.32       |
| <i>MDM2</i>                       | 4193    | 9                 | 12q14.3-q15    |
| <i>TP53</i>                       | 7157    | 2                 | 17p13.1        |
| <i>Notch</i> signaling pathway    |         |                   |                |
| <i>DLL3</i>                       | 10683   | 4                 | 19q13          |
| <i>DTX2</i>                       | 113878  | 1                 | 7q11.23        |
| <i>CREBBP</i>                     | 1387    | 4                 | 16p13.3        |
| <i>PTCRA</i>                      | 171558  | 3                 | 6p21.3         |
| <i>JAG1</i>                       | 182     | 5                 | 20p12.1-p11.23 |
| <i>DVL2</i>                       | 1856    | 2                 | 17p13.1        |
| <i>SNW1</i>                       | 22938   | 3                 | 14q24.3        |
| <i>HES1</i>                       | 3280    | 3                 | 3q28-q29       |
| <i>RBPJ</i>                       | 3516    | 3                 | 4p15.2         |
| <i>NOTCH2</i>                     | 4853    | 4                 | 1p13-p11       |
| <i>PSENEN</i>                     | 55851   | 1                 | 19q13.12       |
| <i>ADAM17</i>                     | 6868    | 3                 | 2p25           |
| <i>NUMB</i>                       | 8650    | 4                 | 14q24.3        |
| <i>NCOR2</i>                      | 9612    | 5                 | 12q24          |

**Table S3.** Type I error rates of four methods (40 vertices and 54 edges in the network)

| Sample size | <i>NetDifM</i> | <i>NetDifMpm</i> | <i>VEWDM</i> | <i>Yates'D</i> |
|-------------|----------------|------------------|--------------|----------------|
| 200         | 0.014          | 0.057            | 0.050        | 0.048          |
| 400         | 0.043          | 0.052            | 0.045        | 0.058          |
| 600         | 0.044          | 0.055            | 0.051        | 0.059          |
| 800         | 0.040          | 0.053            | 0.054        | 0.049          |
| 1000        | 0.050          | 0.050            | 0.051        | 0.055          |

It is necessary to assess the performance of the proposed statistics, given the deviation from the normal distribution. For the network with 10 vertices and 21 edges, we designed the following two scenarios, (i) conduct the exponential transformation for 5 vertices randomly chosen among the 10 vertices; (ii) do the exponential transformation for all 10 vertices.

**Table S4.** Type I error rates of four methods given the deviation from the normal distribution.

| Sample size   | <i>NetDifM</i> | <i>NetDifMpm</i> | <i>VEWDM</i> | <i>Yates'D</i> |
|---------------|----------------|------------------|--------------|----------------|
| scenario (i)  |                |                  |              |                |
| 100           | 0.011          | 0.041            | 0.048        | 0.054          |
| 200           | 0.024          | 0.042            | 0.046        | 0.039          |
| 300           | 0.036          | 0.051            | 0.047        | 0.048          |
| 500           | 0.042          | 0.056            | 0.054        | 0.046          |
| 800           | 0.042          | 0.053            | 0.046        | 0.050          |
| scenario (ii) |                |                  |              |                |
| 100           | 0.009          | 0.051            | 0.058        | 0.048          |
| 200           | 0.018          | 0.045            | 0.055        | 0.047          |
| 300           | 0.028          | 0.050            | 0.048        | 0.054          |
| 500           | 0.027          | 0.046            | 0.054        | 0.058          |
| 800           | 0.040          | 0.055            | 0.057        | 0.045          |

**The derivation of *NetDifM* based on the classical score test.**

Let  $Y = (y_1, y_2, \dots, y_n)$  be an iid sample from a probability density function  $\pi(x, \beta)$

For a generalized linear model  $\log it[p(Y = 1)] = \beta_0 + \beta_1 X$

The log-likelihood function is  $L(\beta | x) = \sum_{l=1}^N (y_l \ln[\pi(x_l)] + (1 - y_l) \ln[1 - \pi(x_l)])$

Hence, the score function is  $U(\beta)$  where

$$U(\beta) = \frac{\partial L(\beta | x)}{\partial \beta} = \sum_{l=1}^N \left( y_l - \frac{\exp(\beta_0 + \beta_1 x_l)}{1 + \exp(\beta_0 + \beta_1 x_l)} \right) x_l$$

Under  $H_0 : \beta_1 = 0$ , the score statistics is

$$U(\hat{\beta}) = \sum_{l=1}^N (y_l - E(y)) x_l = \sum_{l=1}^N (y_l - \bar{Y}) x_l$$

Which can test the significance of the contribution of vertex  $x_i$  to the disease.

For the edge linked  $x_i$  and  $x_j$ , there contribution can be similarly obtained as

$$U(\hat{\beta}) = \sum_{l=1}^N (Y_l - \bar{Y})(x_{li} - \bar{x}_i)(x_{lj} - \bar{x}_j)$$

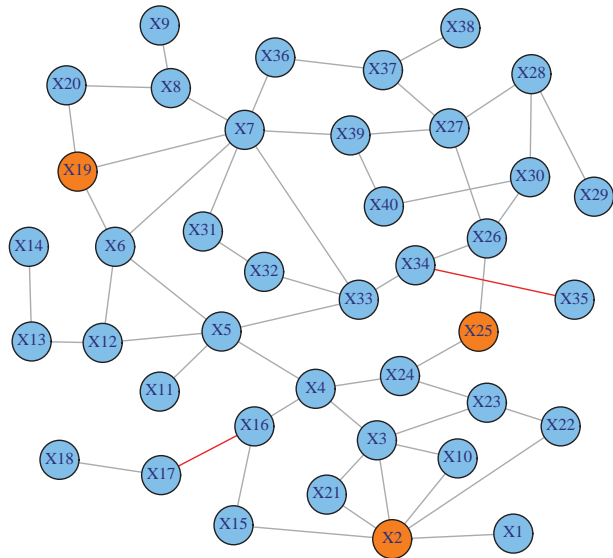

Figure S1 A network including 40 vertices and 54 edges.

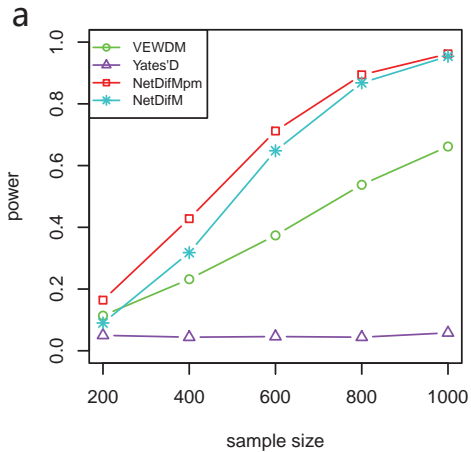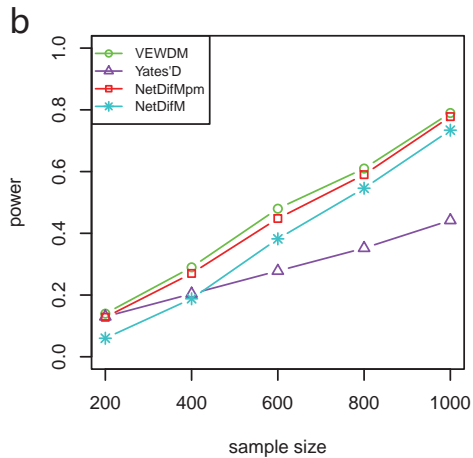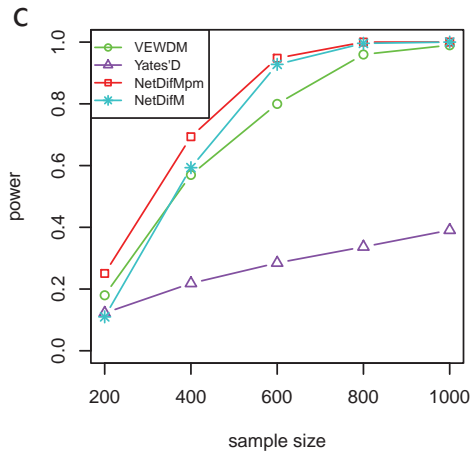

Figure S2. The statistical power of the four methods under three scenarios. (a) only vertices change, (b) only edges change, (c) both vertices and edges change
